# Supplementary material for: Detecting the Multiomics Signatures of Factor-Specific Inflammatory Effects on Airway Smooth Muscles
Source: Front Genet. 2021 Jan 13;11:599970. doi: 10.3389/fgene.2020.599970 (PMC7838645; doi:10.3389/fgene.2020.599970)
Supplement: Supplementary Table 7 — GO enrichment analyses results for signatures on the epigenetic level, transcriptomics level, epigenetic and transcriptomics level. [file Table_7.XLSX]

## Sheet: Epigenetic level
GO.ID	Term	Annotated	Significant	Expected	topgoFisher	cluster
GO:0060666	dichotomous subdivision of terminal units involved in salivary gland branching	5	4	0.27	4.1e-05	BP
GO:1902287	semaphorin-plexin signaling pathway involved in axon guidance	10	5	0.54	9.2e-05	BP
GO:0031901	early endosome membrane	119	17	6.46	0.00023	CC
GO:0002116	semaphorin receptor complex	9	4	0.49	0.00087	CC
GO:0046872	metal ion binding	3282	215	181.15	0.00037	MF

## Sheet: Transcriptomics level
GO.ID	Term	Annotated	Significant	Expected	topgoFisher	cluster
GO:0051301	cell division	463	171	98.28	1.9e-12	BP
GO:0034080	CENP-A containing nucleosome assembly	18	14	3.82	4.7e-07	BP
GO:0071230	cellular response to amino acid stimulus	51	26	10.83	1.7e-05	BP
GO:0001666	response to hypoxia	283	93	60.07	1.9e-05	BP
GO:0006977	DNA damage response, signal transduction by p53 class mediator resulting in cell cycle arrest	47	23	9.98	2.3e-05	BP
GO:0042276	error-prone translesion synthesis	18	12	3.82	4.2e-05	BP
GO:0045540	regulation of cholesterol biosynthetic process	40	19	8.49	8e-05	BP
GO:0010389	regulation of G2/M transition of mitotic cell cycle	151	57	32.05	8.2e-05	BP
GO:1900025	negative regulation of substrate adhesion-dependent cell spreading	10	8	2.12	0.00012	BP
GO:0070987	error-free translesion synthesis	17	11	3.61	0.00013	BP
GO:0000278	mitotic cell cycle	802	266	170.24	0.00017	BP
GO:0007052	mitotic spindle organization	81	35	17.19	0.00022	BP
GO:0097711	ciliary basal body-plasma membrane docking	75	29	15.92	0.00042	BP
GO:0006271	DNA strand elongation involved in DNA replication	16	10	3.4	0.00046	BP
GO:0000727	double-strand break repair via break-induced replication	9	7	1.91	0.00046	BP
GO:0071260	cellular response to mechanical stimulus	66	26	14.01	0.00059	BP
GO:0006297	nucleotide-excision repair, DNA gap filling	17	10	3.61	0.00081	BP
GO:0005829	cytosol	3974	1010	842.79	3e-15	CC
GO:0005654	nucleoplasm	2991	774	634.32	6e-12	CC
GO:0005737	cytoplasm	8732	2081	1851.85	2.4e-07	CC
GO:0005925	focal adhesion	317	105	67.23	4.2e-07	CC
GO:0000777	condensed chromosome kinetochore	72	41	15.27	5.6e-07	CC
GO:0000922	spindle pole	117	49	24.81	3e-05	CC
GO:0005813	centrosome	447	131	94.8	0.00012	CC
GO:0072687	meiotic spindle	9	8	1.91	0.00012	CC
GO:0005730	nucleolus	692	191	146.76	0.00022	CC
GO:0030496	midbody	135	45	28.63	0.00028	CC
GO:0005739	mitochondrion	1125	296	238.59	0.00036	CC
GO:0070062	extracellular exosome	1572	386	333.38	0.00037	CC
GO:0005663	DNA replication factor C complex	5	5	1.06	0.00043	CC
GO:0034663	endoplasmic reticulum chaperone complex	7	6	1.48	0.00052	CC
GO:0030027	lamellipodium	164	54	34.78	0.00055	CC
GO:0005814	centriole	101	36	21.42	0.00057	CC
GO:0005515	protein binding	10525	2386	2220.71	1.8e-11	MF
GO:0030515	snoRNA binding	25	14	5.27	0.00057	MF
GO:0005524	ATP binding	1178	293	248.55	0.00061	MF
GO:0030020	extracellular matrix structural constituent conferring tensile strength	34	16	7.17	0.00065	MF
GO:0042802	identical protein binding	1528	373	322.4	0.00065	MF
GO:0019899	enzyme binding	1797	454	379.16	0.00083	MF

## Sheet: Combined
GO.ID	Term	Annotated	Significant	Expected	topgoFisher	cluster
GO:0051301	cell division	463	156	82.27	3.6e-14	BP
GO:0034080	CENP-A containing nucleosome assembly	18	14	3.2	4.5e-08	BP
GO:0071260	cellular response to mechanical stimulus	66	26	11.73	2.8e-05	BP
GO:0007052	mitotic spindle organization	81	35	14.39	3.1e-05	BP
GO:0010389	regulation of G2/M transition of mitotic cell cycle	151	51	26.83	3.2e-05	BP
GO:0010506	regulation of autophagy	289	71	51.35	5e-05	BP
GO:0048245	eosinophil chemotaxis	15	10	2.67	6.2e-05	BP
GO:0006977	DNA damage response, signal transduction by p53 class mediator resulting in cell cycle arrest	47	20	8.35	6.5e-05	BP
GO:0000086	G2/M transition of mitotic cell cycle	202	72	35.89	6.5e-05	BP
GO:0071230	cellular response to amino acid stimulus	51	22	9.06	7e-05	BP
GO:0036499	PERK-mediated unfolded protein response	21	11	3.73	9.7e-05	BP
GO:0006271	DNA strand elongation involved in DNA replication	16	11	2.84	0.00014	BP
GO:0032201	telomere maintenance via semi-conservative replication	19	11	3.38	0.00018	BP
GO:0006297	nucleotide-excision repair, DNA gap filling	17	10	3.02	0.00018	BP
GO:0070987	error-free translesion synthesis	17	10	3.02	0.00018	BP
GO:0036498	IRE1-mediated unfolded protein response	56	21	9.95	0.00019	BP
GO:0070498	interleukin-1-mediated signaling pathway	77	28	13.68	0.00019	BP
GO:0001666	response to hypoxia	283	82	50.28	0.00031	BP
GO:0045540	regulation of cholesterol biosynthetic process	40	16	7.11	0.00031	BP
GO:0097711	ciliary basal body-plasma membrane docking	75	26	13.33	0.00033	BP
GO:0042276	error-prone translesion synthesis	18	10	3.2	0.00033	BP
GO:0042273	ribosomal large subunit biogenesis	44	16	7.82	0.0004	BP
GO:0006983	ER overload response	11	8	1.95	0.0004	BP
GO:1990440	positive regulation of transcription from RNA polymerase II promoter in response to endoplasmic reticulum stress	10	7	1.78	0.0004	BP
GO:0007049	cell cycle	1416	389	251.6	0.00048	BP
GO:2000379	positive regulation of reactive oxygen species metabolic process	89	27	15.81	0.0005	BP
GO:0090200	positive regulation of release of cytochrome c from mitochondria	22	11	3.91	0.00056	BP
GO:0048662	negative regulation of smooth muscle cell proliferation	53	16	9.42	0.00079	BP
GO:0007059	chromosome segregation	226	73	40.16	0.00086	BP
GO:0090307	mitotic spindle assembly	43	18	7.64	0.00089	BP
GO:0051988	regulation of attachment of spindle microtubules to kinetochore	9	7	1.6	0.0009	BP
GO:0070417	cellular response to cold	6	5	1.07	0.0009	BP
GO:1900264	positive regulation of DNA-directed DNA polymerase activity	6	5	1.07	0.0009	BP
GO:0008299	isoprenoid biosynthetic process	23	12	4.09	0.00099	BP
GO:0031145	anaphase-promoting complex-dependent proteasomal ubiquitin-dependent protein catabolic proces	52	19	9.24	0.00099	BP
GO:0051409	response to nitrosative stress	9	5	1.6	0.00099	BP
GO:0060574	intestinal epithelial cell maturation	4	4	0.71	0.00099	BP
GO:0030947	regulation of vascular endothelial growth factor receptor signaling pathway	29	7	5.15	0.001	BP
GO:0005829	cytosol	3974	862	703.81	1.6e-15	CC
GO:0005654	nucleoplasm	2991	663	529.72	7.9e-13	CC
GO:0000777	condensed chromosome kinetochore	72	42	12.75	2e-09	CC
GO:0005737	cytoplasm	8732	1775	1546.47	3.5e-07	CC
GO:0005925	focal adhesion	317	90	56.14	1.4e-06	CC
GO:0030496	midbody	135	45	23.91	3.8e-06	CC
GO:0005813	centrosome	447	125	79.17	6.5e-06	CC
GO:0005730	nucleolus	692	169	122.56	8.4e-06	CC
GO:0005739	mitochondrion	1125	262	199.24	3.1e-05	CC
GO:0072687	meiotic spindle	9	8	1.59	3.7e-05	CC
GO:0001725	stress fiber	54	22	9.56	6e-05	CC
GO:0000922	spindle pole	117	44	20.72	9.3e-05	CC
GO:0005663	DNA replication factor C complex	5	5	0.89	0.00017	CC
GO:0000778	condensed nuclear chromosome kinetochore	13	11	2.3	0.00018	CC
GO:0034663	endoplasmic reticulum chaperone complex	7	6	1.24	0.00018	CC
GO:0005814	centriole	101	33	17.89	0.00019	CC
GO:0000785	chromatin	947	179	167.72	0.00024	CC
GO:0097431	mitotic spindle pole	21	11	3.72	0.00032	CC
GO:0016020	membrane	7007	1237	1240.96	0.00042	CC
GO:0031390	Ctf18 RFC-like complex	6	5	1.06	0.00089	CC
GO:0005515	protein binding	10525	2014	1859.11	8.4e-12	MF
GO:0005524	ATP binding	1178	259	208.08	4.1e-05	MF
GO:0008017	microtubule binding	198	55	34.97	0.0002	MF
GO:0017147	Wnt-protein binding	24	12	4.24	0.0003	MF
GO:0030020	extracellular matrix structural constituent conferring tensile strength	34	15	6.01	0.00031	MF
GO:0016887	ATPase activity	282	73	49.81	0.00035	MF
GO:0019901	protein kinase binding	555	136	98.03	0.00038	MF
GO:0003777	microtubule motor activity	65	20	11.48	0.00078	MF
GO:0001965	G-protein alpha-subunit binding	23	11	4.06	0.00085	MF
GO:0070679	inositol 1,4,5 trisphosphate binding	11	7	1.94	0.0009	MF
